# Supplementary material for: Distribution of phosphorus fractions of different plant availability in German forest soils and their relationship to common soil properties and foliar P concentrations
Source: Copernicus journal article supplement (doi:10.5194/soil-2018-40), 2018-12-11
Supplement: Supplementary file 1 [file soil-2018-40-supplement.pdf]

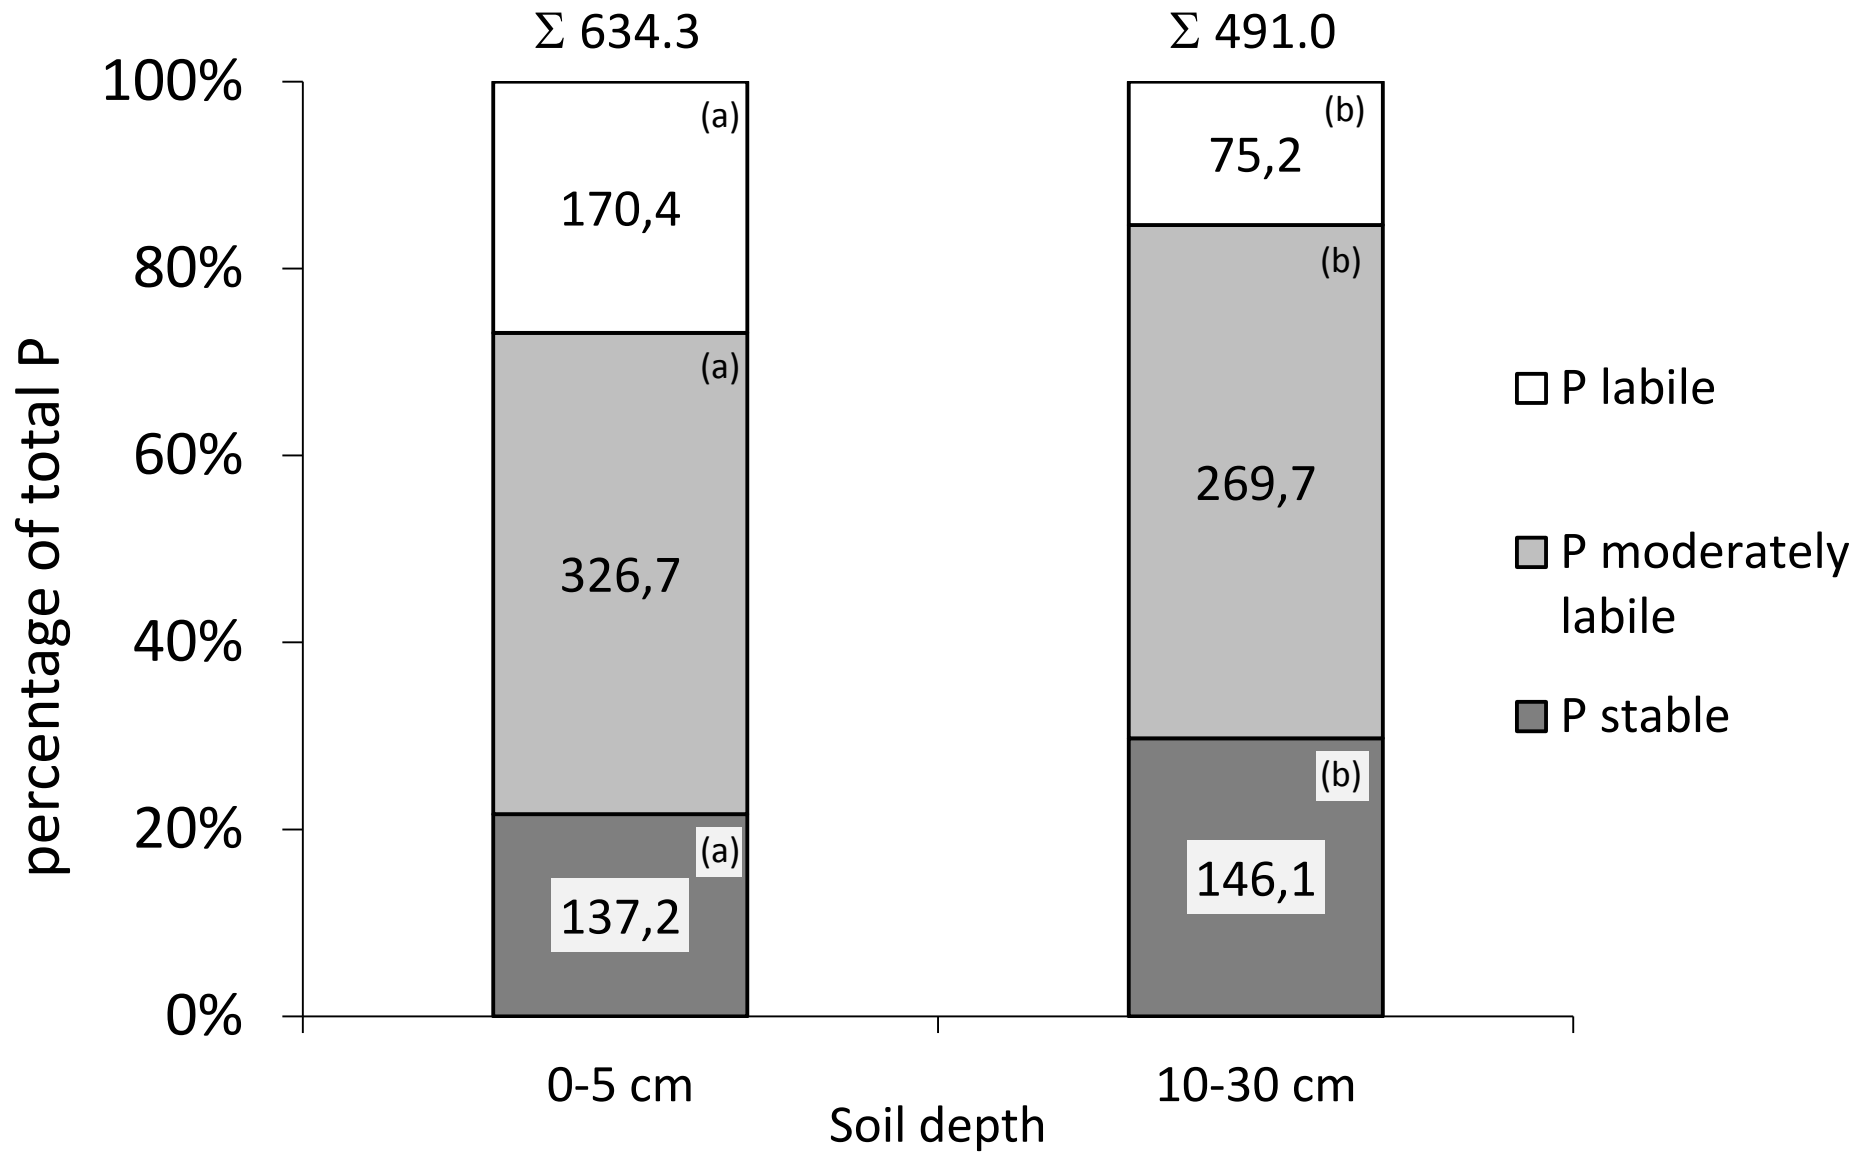

**Figure S1:** Mean values of P concentration and percentage of total P for all GFSI samples, grouped by depth, dark grey boxes P stable, light grey boxes P moderately labile and white boxes P labile, different letters per row showed significant differences in P pools per depths, non-parametric Wilcoxon test,  $\alpha < 0.05$ .

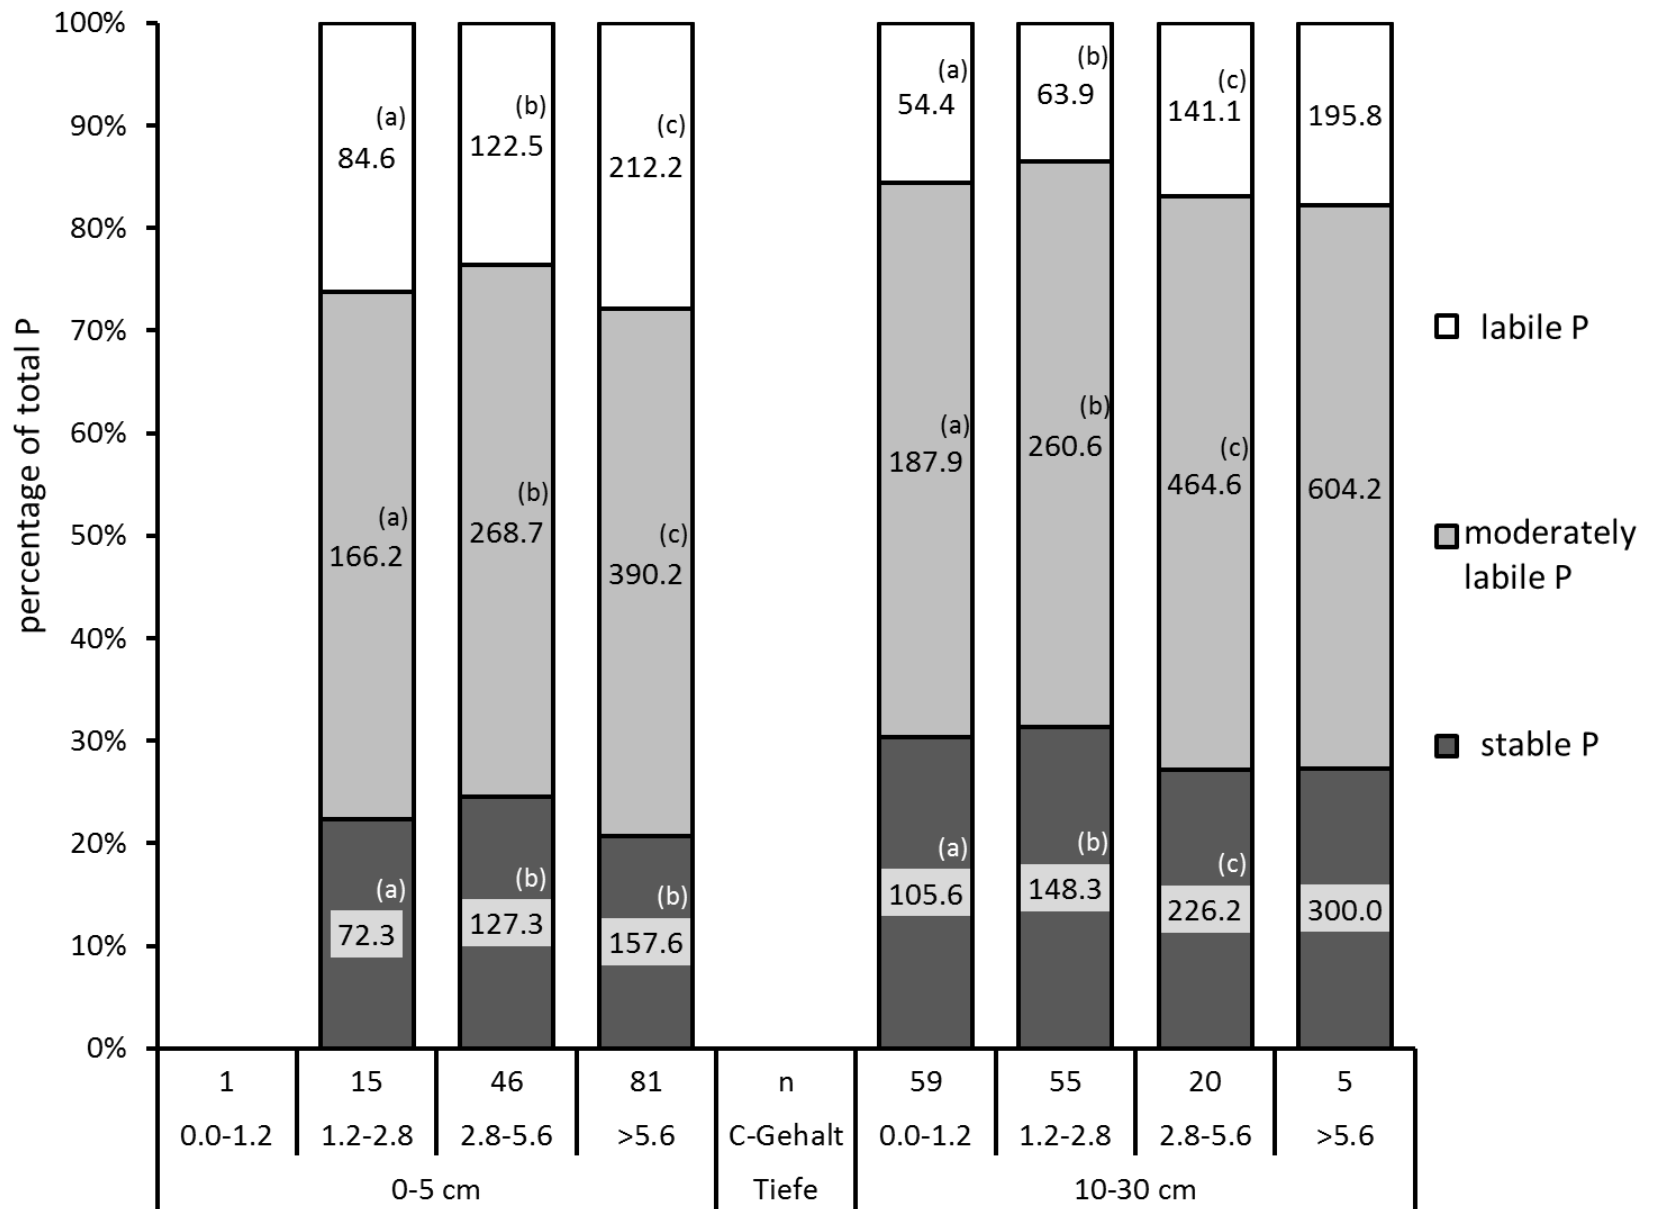

**Figure S2:** Absolute and relative shares of Hedley P pools and total P (mean values), grouped by grouped by C-content in % and depth; different letters per row showed significant differences in absolute values between C-classes, non-parametric Mann-Whitney-U-test,  $\alpha < 0.05$ .

**Table S1:** Mean values ( $\pm$  standard deviation) of Hedley P fractions in soil samples, grouped by soil depth and soil acidity classes as indicated by pH ranges, all values in  $\text{mg kg}^{-1}$ .

| Depth    | pH-range | n  | Pi Resin <sup>#</sup> | Pi HCO <sub>3</sub> <sup>#</sup> | Po HCO <sub>3</sub> <sup>#</sup> | Pi NaOH <sup>#</sup> | Po NaOH <sup>#</sup> | Pi 1M HCl <sup>#</sup> | P HCL <sub>conc</sub> <sup>#</sup> | P Residual <sup>#</sup> |
|----------|----------|----|-----------------------|----------------------------------|----------------------------------|----------------------|----------------------|------------------------|------------------------------------|-------------------------|
|          |          |    | $\text{mg kg}^{-1}$   | $\text{mg kg}^{-1}$              | $\text{mg kg}^{-1}$              | $\text{mg kg}^{-1}$  | $\text{mg kg}^{-1}$  | $\text{mg kg}^{-1}$    | $\text{mg kg}^{-1}$                | $\text{mg kg}^{-1}$     |
|          |          |    | labile P              |                                  |                                  | moderately labile P  |                      |                        | stable P                           |                         |
| 0-5 cm   | > 6.2    | 6  | 34.7 $\pm$ 14.1 a     | 24.1 $\pm$ 11.5 a                | 28.5 $\pm$ 13.9 a                | 35.2 $\pm$ 23.9 a    | 215.3 $\pm$ 156.8 a  | 48.9 $\pm$ 36.9 ab     | 262.3 $\pm$ 165.3 a                | 105.6 $\pm$ 60.5 a      |
|          | 5.0-6.2  | 15 | 40.1 $\pm$ 11.8 a     | 23.3 $\pm$ 11.7 a                | 59.6 $\pm$ 33.2 b                | 79.4 $\pm$ 43.0 ab   | 217.5 $\pm$ 125.9 a  | 71.1 $\pm$ 55.1 b      | 162.7 $\pm$ 108.1 a                | 67.2 $\pm$ 30.7 ab      |
|          | 4.2-5.0  | 43 | 46.3 $\pm$ 35.2 a     | 32.4 $\pm$ 33.0 a                | 77.6 $\pm$ 41.5 b                | 103.4 $\pm$ 111.0 b  | 190.5 $\pm$ 108.8 a  | 70.6 $\pm$ 160.6 b     | 109.9 $\pm$ 93.5 b                 | 44.6 $\pm$ 27.6 b       |
|          | 3.0-4.2  | 80 | 55.0 $\pm$ 41.0 a     | 37.3 $\pm$ 48.1 a                | 101.0 $\pm$ 65.5 c               | 80.6 $\pm$ 90.9 a    | 189.2 $\pm$ 150.1 a  | 30.2 $\pm$ 37.9 a      | 64.2 $\pm$ 69.6 c                  | 29.8 $\pm$ 16.9 c       |
| 10-30 cm | > 6.2    | 6  | 19.5 $\pm$ 8.2 a      | 11.7 $\pm$ 7.9 ab                | 23.9 $\pm$ 12.7 ab               | 22.0 $\pm$ 14.1 a    | 143.7 $\pm$ 148.2 ab | 98.7 $\pm$ 79.2 a      | 278.3 $\pm$ 212.1 a                | 141.1 $\pm$ 36.8 a      |
|          | 5.0-6.2  | 21 | 19.6 $\pm$ 20.0 a     | 16.5 $\pm$ 17.9 a                | 26.9 $\pm$ 18.2 ab               | 105.6 $\pm$ 108.7 ab | 105.5 $\pm$ 86.7 ab  | 162.4 $\pm$ 316.7 a    | 178.0 $\pm$ 128.2 a                | 61.2 $\pm$ 30.7 b       |
|          | 4.2-5.0  | 81 | 22.6 $\pm$ 26.6 a     | 25.6 $\pm$ 35.0 a                | 37.0 $\pm$ 34.2 a                | 112.6 $\pm$ 110.9 b  | 143.1 $\pm$ 111.6 a  | 38.7 $\pm$ 48.5 b      | 95.7 $\pm$ 91.3 b                  | 36.3 $\pm$ 24.3 c       |
|          | 3.0-4.2  | 31 | 18.0 $\pm$ 24.8 a     | 19.5 $\pm$ 51.2 b                | 23.3 $\pm$ 22.0 b                | 65.0 $\pm$ 89.5 a    | 59.6 $\pm$ 36.9 b    | 17.2 $\pm$ 19.4 c      | 42.9 $\pm$ 25.6 c                  | 28.1 $\pm$ 15.0 c       |

#) different letters within columns and per depth indicate significant differences between the pH-classes; non-parametric Mann-Whitney-U-test,  $\alpha < 0.05$ .

**Table S2:** Mean value ( $\pm$  standard deviation) for P pools of all soil samples, grouped by soil depth and pH-value, all values in  $\text{mg kg}^{-1}$ .

| Depth    | pH-range | n  | P                                         |                                                      |                                           | Pi extractable <sup>#</sup><br>mg k <sup>-1</sup> | Po extractable <sup>#</sup><br>mg k <sup>-1</sup> |   |                   |   |                   |    |
|----------|----------|----|-------------------------------------------|------------------------------------------------------|-------------------------------------------|---------------------------------------------------|---------------------------------------------------|---|-------------------|---|-------------------|----|
|          |          |    | labile <sup>#</sup><br>mg k <sup>-1</sup> | moderately labile <sup>#</sup><br>mg k <sup>-1</sup> | stable <sup>#</sup><br>mg k <sup>-1</sup> |                                                   |                                                   |   |                   |   |                   |    |
| 0-5 cm   | > 6.2    | 6  | 87.3 $\pm$ 41.9                           | a                                                    | 299.3 $\pm$ 210.2                         | a                                                 | 367.9 $\pm$ 199.0                                 | a | 142.8 $\pm$ 74.6  | a | 243.8 $\pm$ 186.5 | a  |
|          | 5.0-6.2  | 15 | 123.1 $\pm$ 43.5                          | a                                                    | 368.0 $\pm$ 184.2                         | a                                                 | 230.0 $\pm$ 122.8                                 | a | 214.0 $\pm$ 112.8 | a | 214.0 $\pm$ 112.8 | a  |
|          | 4.2-5.0  | 43 | 156.3 $\pm$ 86.8                          | b                                                    | 364.5 $\pm$ 324.6                         | a                                                 | 154.4 $\pm$ 117.6                                 | b | 252.7 $\pm$ 308.8 | a | 268.1 $\pm$ 148.1 | a  |
|          | 3.0-4.2  | 80 | 193.3 $\pm$ 138.2                         | b                                                    | 300.0 $\pm$ 248.7                         | a                                                 | 93.9 $\pm$ 79.4                                   | c | 203.1 $\pm$ 195.6 | a | 290.2 $\pm$ 212.2 | a  |
| 10-30 cm | > 6.2    | 6  | 55.2 $\pm$ 26.0                           | ab                                                   | 264.4 $\pm$ 161.9                         | a                                                 | 419.4 $\pm$ 211.1                                 | a | 151.9 $\pm$ 86.8  | a | 167.6 $\pm$ 158.9 | ab |
|          | 5.0-6.2  | 21 | 62.9 $\pm$ 42.7                           | ab                                                   | 373.5 $\pm$ 488.3                         | a                                                 | 239.3 $\pm$ 152.1                                 | b | 304.1 $\pm$ 455.3 | a | 132.4 $\pm$ 104.4 | ab |
|          | 4.2-5.0  | 81 | 85.1 $\pm$ 83.4                           | a                                                    | 294.4 $\pm$ 216.9                         | a                                                 | 132.0 $\pm$ 108.7                                 | c | 199.5 $\pm$ 187.5 | a | 180.1 $\pm$ 142.9 | a  |
|          | 3.0-4.2  | 31 | 60.8 $\pm$ 88.8                           | b                                                    | 141.8 $\pm$ 135.0                         | b                                                 | 71.0 $\pm$ 30.9                                   | d | 119.7 $\pm$ 174.8 | b | 82.9 $\pm$ 55.2   | b  |

#) different letters indicate significant differences between the pH-classes, valid per column and per depth, non-parametric Mann-Whitney-U-test,  $\alpha < 0.05$ .

**Table S3:** Mean values ( $\pm$  standard deviation) of Hedley P fractions of all analyzed GFSI samples, grouped by depth and carbon content, all values in  $\text{mg kg}^{-1}$ .

| Depth    | Carbon content | n  | Pi Resin <sup>#</sup> | Pi HCO <sub>3</sub> <sup>#</sup> | Po HCO <sub>3</sub> <sup>#</sup> | Pi NaOH <sup>#</sup> | Po NaOH <sup>#</sup> | Pi 1M HCl <sup>#</sup> | P HCL <sub>conc</sub> <sup>#</sup> | P Residual <sup>#</sup> |
|----------|----------------|----|-----------------------|----------------------------------|----------------------------------|----------------------|----------------------|------------------------|------------------------------------|-------------------------|
|          |                |    | $\text{mg kg}^{-1}$   | $\text{mg kg}^{-1}$              | $\text{mg kg}^{-1}$              | $\text{mg kg}^{-1}$  | $\text{mg kg}^{-1}$  | $\text{mg kg}^{-1}$    | $\text{mg kg}^{-1}$                | $\text{mg kg}^{-1}$     |
|          |                |    | labile P              |                                  |                                  | moderately labile P  |                      |                        | stable P                           |                         |
| 0-5 cm   | 0.0-1.2        | 1  | 30.9                  | 41.0                             | 18.3                             | 27.8                 | 25.7                 | 4.0                    | 8.0                                | 4.3                     |
|          | 1.2-2.8        | 15 | 28.4 $\pm$ 27.1 a     | 22.6 $\pm$ 30.8 a                | 33.7 $\pm$ 22.9 a                | 56.0 $\pm$ 76.9 a    | 77.3 $\pm$ 67.6 a    | 32.9 $\pm$ 40.5 a      | 49.6 $\pm$ 58.7 a                  | 22.7 $\pm$ 15.6 a       |
|          | 2.8-5.6        | 46 | 40.0 $\pm$ 28.1 b     | 24.5 $\pm$ 25.7 a                | 58.1 $\pm$ 26.0 b                | 77.8 $\pm$ 100.3 b   | 132.0 $\pm$ 66.8 b   | 58.9 $\pm$ 156.9 a     | 86.6 $\pm$ 96.1 b                  | 40.7 $\pm$ 28.0 b       |
|          | >5.6           | 81 | 58.9 $\pm$ 39.9 c     | 41.1 $\pm$ 48.1 b                | 112.1 $\pm$ 60.9 c               | 96.7 $\pm$ 92.5 b    | 249.1 $\pm$ 146.9 c  | 44.4 $\pm$ 48.4 a      | 112.0 $\pm$ 105.8 b                | 44.1 $\pm$ 33.9 b       |
| 10-30 cm | 0.0-1.2        | 59 | 18.9 $\pm$ 23.6 a     | 19.2 $\pm$ 23.1 ac               | 16.3 $\pm$ 9.4 a                 | 81.8 $\pm$ 72.5 a    | 64.5 $\pm$ 49.7 a    | 41.6 $\pm$ 64.3 a      | 71.6 $\pm$ 82.4 a                  | 34.0 $\pm$ 26.2 a       |
|          | 1.2-2.8        | 55 | 17.9 $\pm$ 20.1 a     | 15.6 $\pm$ 23.0 a                | 30.4 $\pm$ 15.3 b                | 81.9 $\pm$ 91.5 a    | 107.1 $\pm$ 67.7 b   | 71.6 $\pm$ 209.2 a     | 104.2 $\pm$ 103.5 a                | 45.7 $\pm$ 34.0 ab      |
|          | 2.8-5.6        | 20 | 32.5 $\pm$ 30.8 b     | 42.6 $\pm$ 63.8 b                | 66.1 $\pm$ 35.7 c                | 159.4 $\pm$ 135.7 b  | 255.0 $\pm$ 99.2 c   | 50.2 $\pm$ 37.6 b      | 166.6 $\pm$ 115.9 b                | 59.6 $\pm$ 39.0 b       |
|          | >5.6           | 5  | 39.1 $\pm$ 43.8       | 60.0 $\pm$ 90.9                  | 96.7 $\pm$ 71.8                  | 203.0 $\pm$ 273.1    | 349.5 $\pm$ 141.6    | 51.6 $\pm$ 33.2        | 235.5 $\pm$ 241.7                  | 64.4 $\pm$ 55.9         |

#) different letters indicate significant differences between C content classes, valid per column and per depth, non-parametric Mann-Whitney-U-test,  $\alpha < 0.05$ .

**Table S4:** Mean ( $\pm$  standard deviation) value for P pools of all soil samples, grouped by soil depth and Carbon content (%), all values in  $\text{mg kg}^{-1}$ .

| Depth       | Carbon content<br>% | n  | P<br>labile <sup>#</sup> | P<br>moderately<br>labile <sup>#</sup> | P<br>stable <sup>#</sup> | Pi<br>extractable <sup>#</sup> | Po<br>extractable <sup>#</sup> |
|-------------|---------------------|----|--------------------------|----------------------------------------|--------------------------|--------------------------------|--------------------------------|
|             |                     |    | $\text{mg k}^{-1}$       | $\text{mg k}^{-1}$                     | $\text{mg k}^{-1}$       | $\text{mg k}^{-1}$             | $\text{mg k}^{-1}$             |
| 0-5<br>cm   | 0.0-1.2             | 1  | 90.3                     | 57.5                                   | 12.3                     | 103.8                          | 44.0                           |
|             | 1.2-2.9             | 15 | 84.6 $\pm$ 77.0 a        | 166.2 $\pm$ 170.1 a                    | 72.3 $\pm$ 69.1 a        | 139.8 $\pm$ 157.1 a            | 110.9 $\pm$ 87.3 a             |
|             | 2.9-5.8             | 46 | 122.5 $\pm$ 63.2 b       | 268.7 $\pm$ 303.9 b                    | 127.3 $\pm$ 117.8 b      | 201.1 $\pm$ 290.7 a            | 190.1 $\pm$ 83.8 b             |
|             | >5.8                | 81 | 212.2 $\pm$ 128.3 c      | 390.2 $\pm$ 240.7 c                    | 157.6 $\pm$ 126.9 b      | 241.1 $\pm$ 194.6 b            | 361.2 $\pm$ 194.8 c            |
| 10-30<br>cm | 0.0-1.2             | 59 | 54.4 $\pm$ 49.0 a        | 187.9 $\pm$ 153.7 a                    | 105.6 $\pm$ 103.2 a      | 161.6 $\pm$ 147.0 a            | 80.7 $\pm$ 57.3 a              |
|             | 1.2-2.9             | 55 | 63.9 $\pm$ 47.4 b        | 260.6 $\pm$ 320.5 ac                   | 148.3 $\pm$ 124.1 ac     | 186.9 $\pm$ 304.7 a            | 137.5 $\pm$ 78.1 b             |
|             | 2.9-5.8             | 20 | 141.1 $\pm$ 111.4 c      | 464.6 $\pm$ 200.8 b                    | 226.2 $\pm$ 134.1 b      | 284.7 $\pm$ 226.9 b            | 321.1 $\pm$ 125.2 c            |
|             | >5.8                | 5  | 195.8 $\pm$ 200.1 c      | 604.2 $\pm$ 375.6 bc                   | 300.0 $\pm$ 296.8 bc     | 353.8 $\pm$ 425.6 ab           | 446.3 $\pm$ 192.9 c            |

#) different letters indicate significant differences between the pH classes, valid per column and per depth, non-parametric Mann-Whitney-U-test,  $\alpha < 0.05$ .

**Table S5:** Mean values ( $\pm$  standard deviation) of Hedley P fractions of GFSI samples, grouped by soil depth and soil texture, all values in  $\text{mg kg}^{-1}$

| Depth    | Soil texture | n  | Pi Resin <sup>#</sup> | Pi HCO <sub>3</sub> <sup>#</sup> | Po HCO <sub>3</sub> <sup>#</sup> | Pi NaOH <sup>#</sup> | Po NaOH <sup>#</sup> | Pi 1M HCl <sup>#</sup> | P HCL <sub>conc</sub> <sup>#</sup> | P Residual <sup>#</sup> |
|----------|--------------|----|-----------------------|----------------------------------|----------------------------------|----------------------|----------------------|------------------------|------------------------------------|-------------------------|
|          |              |    | $\text{mg kg}^{-1}$   | $\text{mg kg}^{-1}$              | $\text{mg kg}^{-1}$              | $\text{mg kg}^{-1}$  | $\text{mg kg}^{-1}$  | $\text{mg kg}^{-1}$    | $\text{mg kg}^{-1}$                | $\text{mg kg}^{-1}$     |
|          |              |    | labile P              |                                  |                                  | moderately labile P  |                      |                        | stable P                           |                         |
| 0-5 cm   | sand         | 21 | 22.7 $\pm$ 13.8 a     | 15.9 $\pm$ 15.0 a                | 39.6 $\pm$ 27.3 a                | 16.9 $\pm$ 13.5 a    | 55.5 $\pm$ 34.3 a    | 4.8 $\pm$ 4.5 a        | 16.7 $\pm$ 9.2 a                   | 15.6 $\pm$ 10.4 a       |
|          | loam         | 37 | 49.8 $\pm$ 35.2 b     | 35.0 $\pm$ 62.2 ab               | 87.5 $\pm$ 50.2 b                | 73.5 $\pm$ 100.6 b   | 153.6 $\pm$ 94.0 b   | 30.7 $\pm$ 32.0 b      | 49.8 $\pm$ 27.7 b                  | 29.4 $\pm$ 16.7 b       |
|          | silt         | 71 | 57.3 $\pm$ 40.6 b     | 39.0 $\pm$ 34.0 c                | 103.7 $\pm$ 61.8 b               | 111.3 $\pm$ 96.7 c   | 242.6 $\pm$ 136.0 c  | 66.9 $\pm$ 130.4 c     | 120.9 $\pm$ 93.7 c                 | 48.1 $\pm$ 30.4 c       |
|          | clay         | 15 | 47.5 $\pm$ 22.4 b     | 30.3 $\pm$ 17.7 bc               | 63.0 $\pm$ 41.0 a                | 91.1 $\pm$ 73.0 bc   | 242.9 $\pm$ 158.2 c  | 56.6 $\pm$ 42.7 c      | 205.9 $\pm$ 157.0 c                | 73.9 $\pm$ 40.4 d       |
| 10-30 cm | sand         | 22 | 17.9 $\pm$ 23.3 a     | 32.3 $\pm$ 59.7 a                | 18.9 $\pm$ 21.0 a                | 55.0 $\pm$ 87.9 a    | 38.7 $\pm$ 35.5 a    | 7.7 $\pm$ 10.0 a       | 17.8 $\pm$ 12.0 a                  | 17.4 $\pm$ 15.1 a       |
|          | loam         | 42 | 21.5 $\pm$ 29.3 a     | 24.0 $\pm$ 41.2 a                | 36.9 $\pm$ 38.2 b                | 103.2 $\pm$ 127.0 b  | 133.4 $\pm$ 110.2 b  | 30.6 $\pm$ 23.9 b      | 59.9 $\pm$ 29.7 b                  | 29.8 $\pm$ 17.9 b       |
|          | silt         | 60 | 20.1 $\pm$ 21.9 ab    | 17.7 $\pm$ 20.4 a                | 33.3 $\pm$ 27.1 b                | 109.9 $\pm$ 100.6 b  | 134.4 $\pm$ 103.3 b  | 86.0 $\pm$ 204.5 bc    | 137.2 $\pm$ 115.1 c                | 47.9 $\pm$ 24.0 c       |
|          | clay         | 16 | 27.8 $\pm$ 24.7 b     | 22.9 $\pm$ 32.8 a                | 29.4 $\pm$ 18.3 b                | 87.5 $\pm$ 82.2 ab   | 126.9 $\pm$ 106.7 b  | 66.2 $\pm$ 47.0 c      | 209.7 $\pm$ 159.6 c                | 90.2 $\pm$ 55.8 d       |

#) different letters indicate significant differences between main texture classes, valid per column and per depth, non-parametric Mann-Whitney-U-test,  $\alpha < 0.05$ .

**Table S6:** Results of linear regression models for P pools and P fractions, by soil variables in 10-30 cm soil depth, model quality and standardized regression coefficients.

| depth 10-30 cm          | n = 139                 | predictor variables                               |               |               |
|-------------------------|-------------------------|---------------------------------------------------|---------------|---------------|
|                         |                         | carbon<br>mg kg <sup>-1</sup>                     | sand<br>%     | pH            |
| <b>target</b>           | <i>r</i> <sup>2</sup> # | standardized regression coefficients <sup>§</sup> |               |               |
| log P labile            | <i>0.26</i>             | <i>0.495</i>                                      | <i>-0.155</i> | <i>-0.176</i> |
| log P moderately labile | 0.43                    | <b>0.469</b>                                      | -0.434        | -0.250        |
| log P stable            | <b>0.62</b>             | 0.156                                             | <b>-0.637</b> | 0.239         |
| log pi resin            | <i>0.10</i>             | <i>0.265</i>                                      | <i>-0.164</i> |               |
| log Pi HCO <sub>3</sub> | <i>0.09</i>             | <i>0.305</i>                                      |               |               |
| log Po HCO <sub>3</sub> | 0.41                    | <b>0.589</b>                                      | -0.213        | -0.324        |
| log Pi NaOH             | <i>0.23</i>             | <i>0.242</i>                                      | <i>-0.407</i> | <i>-0.302</i> |
| log Po NaOH             | 0.54                    | <b>0.564</b>                                      | -0.436        | -0.224        |
| log Pi 1M HCl           | <i>0.37</i>             |                                                   | <i>-0.531</i> | <i>0.188</i>  |
| log P HCL conc          | 0.55                    | 0.173                                             | <b>-0.576</b> | 0.213         |
| log P residual          | 0.47                    |                                                   | <b>-0.580</b> | 0.231         |

# adjusted *r*<sup>2</sup>, P pools or P fractions with model performance *r*<sup>2</sup> below 0.4 are shown in italics. § significant predictors (*p* < 0.05, F-Test) are shown, strongest predictor are presented in bold.
